# Effect of Maternal Body Mass Index on Postpartum Hemorrhage

Alexander J. Butwick, M.B.B.S., F.R.C.A., Anisha Abreo, M.P.H., Brian T. Bateman, M.D., M.Sc., Henry C. Lee, M.D., M.S., Yasser Y. El-Sayed, M.D., Olof Stephansson, M.D., Ph.D., Pamela Flood, M.D.

## ABSTRACT

**Background:** It is unclear whether obesity is a risk factor for postpartum hemorrhage. The authors hypothesized that obese women are at greater risk of hemorrhage than women with a normal body mass index.

**Methods:** The authors conducted a cohort study of women who underwent delivery hospitalization in California between 2008 and 2012. Using multilevel regression, the authors examined the relationships between body mass index with hemorrhage (primary outcome), atonic hemorrhage, and severe hemorrhage (secondary outcomes). Stratified analyses were performed according to delivery mode.

**Results:** The absolute event rate for hemorrhage was 60,604/2,176,673 (2.8%). In this cohort, 4% of women were underweight, 49.1% of women were normal body mass index, 25.9% of women were overweight, and 12.7%, 5.2%, and 3.1% of women were in obesity class I, II, and III, respectively. Compared to normal body mass index women, the odds of hemorrhage and atonic hemorrhage were modestly increased for overweight women (hemorrhage: adjusted odds ratio [aOR], 1.06; 99% CI, 1.04 to 1.08; atonic hemorrhage: aOR, 1.07; 99% CI, 1.05 to 1.09) and obesity class I (hemorrhage: aOR, 1.08; 99% CI, 1.05 to 1.11; atonic hemorrhage: aOR, 1.11; 99% CI, 1.08 to 1.15). After vaginal delivery, overweight and obese women had up to 19% increased odds of hemorrhage or atonic hemorrhage; whereas, after cesarean delivery, women in any obesity class had up to 14% decreased odds of severe hemorrhage.

**Conclusions:** The authors' findings suggest that, at most, maternal obesity has a modest effect on hemorrhage risk. The direction of the association between hemorrhage and body mass index may differ by delivery mode. (**ANESTHESIOLOGY 2018; 128:774-83**)

POSTPARTUM hemorrhage is a leading cause of maternal morbidity and mortality in the United States.<sup>1-3</sup> Furthermore, between 1994 and 2006, the rate of postpartum hemorrhage increased by 26%.<sup>4</sup> Well-known risk factors, including multiple gestation, polyhydramnios, placenta previa, and abruption, only explain a small portion of the hazard.<sup>5</sup> As part of regional and national efforts to reduce rates of severe peripartum morbidity,<sup>6-8</sup> clarification of less well-established risk factors for postpartum hemorrhage is needed to advance risk assessment. Risk assessment is of important clinical relevance to obstetricians and anesthesiologists. Both sets of providers play key roles in the triage, management, and peripartum care planning for women at risk for postpartum hemorrhage.

In the United States, the prevalence of maternal obesity has been steadily rising, with more than half of pregnant women classified as overweight or obese.<sup>9,10</sup> A panel of obstetric experts have speculated that the rising prevalence of maternal obesity in developed countries may explain the increase in postpartum hemorrhage incidence, and they

### What We Already Know about This Topic

- Postpartum hemorrhage is a leading cause of maternal morbidity and mortality. The incidence of postpartum hemorrhage is increasing. The incidence of maternal obesity is also increasing; however, the link between obesity and postpartum hemorrhage is unclear.

### What This Article Tells Us That Is New

- Obesity was not found to be a strong risk factor for postpartum hemorrhage.

have called for more research to examine whether obesity is a key risk factor.<sup>11</sup> However, ongoing controversy surrounds the potential association between maternal body mass index (BMI) and postpartum hemorrhage. Data from several population-based studies suggest that obese women are at increased risk of postpartum hemorrhage or atonic hemorrhage.<sup>12,13</sup> In other studies, obesity is reported to have a protective effect<sup>14</sup> or no association with postpartum hemorrhage.<sup>15-17</sup>

This article was presented at the best research paper session at the 49th annual meeting of the Society for Obstetric Anesthesia and Perinatology, Seattle, Washington, May 12, 2017.

Submitted for publication August 1, 2017. Accepted for publication December 12, 2017. From the Department of Anesthesiology, Perioperative, and Pain Medicine (A.J.B., P.F.), the Division of Neonatal and Developmental Medicine (H.C.L.), the Department of Obstetrics and Gynecology (Y.Y.E.-S.), Stanford University School of Medicine, Stanford, California; the California Maternal Quality Care Collaborative, Medical School Office Building, Stanford, California (A.A.); the Department of Anesthesiology, Brigham and Women's Hospital/Harvard Medical School, Boston, Massachusetts (B.T.B.); the Department of Medicine Solna, Clinical Epidemiology Unit, and the Department of Women's and Children's Health, Karolinska Institutet, Stockholm, Sweden (O.S.).

Copyright © 2018, the American Society of Anesthesiologists, Inc. Wolters Kluwer Health, Inc. All Rights Reserved. Anesthesiology 2018; 128:774-83

Postpartum hemorrhage risk is known to vary according to mode of delivery.<sup>18,19</sup> However, the joint effect of obesity and mode of delivery on hemorrhage risk has not been previously explored and may clarify some aspects of the previously noted controversy. Tissue injury and surgical morbidity occur more commonly in obese women than in nonobese women.<sup>20,21</sup> These factors may contribute to a greater risk of postpartum hemorrhage for obese women undergoing cesarean delivery than for women undergoing vaginal delivery with comparable BMI. Therefore, the risk of postpartum hemorrhage may not be uniform in each BMI class across all modes of delivery. Examining the individual and joint contributions of obesity and mode of delivery to postpartum hemorrhage would clarify the interplay between these two potentially important risk factors, and would possibly allow more tailored approaches to postpartum hemorrhage prevention and management.

In this study, our primary aim was to investigate the association between maternal BMI with postpartum hemorrhage. We hypothesized that obese women are at greater risk of postpartum hemorrhage than women with a normal BMI. As secondary aims, we performed exploratory analyses to examine the independent associations of maternal BMI with atonic and severe postpartum hemorrhage, as well as to examine the joint effects of maternal BMI and delivery mode on hemorrhage risk.

## Materials and Methods

We performed a retrospective cohort study analyzing linked vital statistics birth data and hospital discharge data of women who underwent delivery hospitalizations in California between January 1, 2008, and December 31, 2012. The linked dataset allows for evaluation of prepregnancy BMI data not available in hospital discharge data. Births that occurred in military hospitals, birth centers, or at home are not reported in state hospital discharge data and thus were excluded from the study cohort. We also excluded all terminations, deliveries at earlier than 20 weeks' gestation, and women with missing prepregnancy BMI or birth dates. Stanford University Institutional Review Board (Stanford, California) approved the study.

The exposure of interest was prepregnancy BMI (hereafter referred to as maternal BMI). Maternal BMI was categorized using World Health Organization Internal Classification.<sup>22</sup> Specifically, categories comprise: underweight (BMI less than 18.5 kg/m<sup>2</sup>), normal BMI (BMI between 18.5 and 24.9 kg/m<sup>2</sup>), overweight (BMI between 25 and 29.9 kg/m<sup>2</sup>), obese class I (BMI between 30 and 34.9 kg/m<sup>2</sup>), obese class II (BMI between 35 and 39.9 kg/m<sup>2</sup>), and obese class III (BMI greater than or equal to 40 kg/m<sup>2</sup>).

The primary outcome measure was postpartum hemorrhage, which was identified in our dataset using International Classification of Diseases, Ninth Revision, Clinical Modification (ICD-9-CM) diagnosis codes 666.x. In our secondary analyses, we examined the associations between

maternal obesity with atonic postpartum hemorrhage and severe postpartum hemorrhage. We then evaluated the effect of delivery mode on each hemorrhage outcome measure. Atonic hemorrhage was classified by ICD-9-CM codes 666.1, and severe hemorrhage classified jointly by ICD-9-CM codes for postpartum hemorrhage and transfusion. Transfusion was identified by ICD-9-CM codes 99.0x.

## Statistical Analysis

Statistical analysis was performed with SAS 9.3 (SAS Institute Inc, USA). Prior to data analyses, the statistical plan for the primary and secondary study aims was reviewed by all study investigators in August 2015. The study design and analytic plan was assessed by members of the Stanford Child Health Research Institute at Stanford University (Stanford, California) in September 2015.

We performed descriptive analyses to characterize the patient characteristics across increasing categories of BMI. Cochran-Armitage trend test was used to assess the crude associations between each hemorrhage outcome with increasing BMI class. To assess the independent associations between each hemorrhage outcome with BMI class, we performed multilevel mixed effects regression analyses adjusting for potential confounding variables as fixed effects: maternal age (younger than 20, 20 to 24, 25 to 29, 30 to 34, 35 to 39, 40 yr or older), race/ethnicity (Non-Hispanic White, Non-Hispanic Black; Non-Hispanic Asian; Hawaiian or Pacific Islander; American Indian or Alaskan Native; Hispanic; Non-Hispanic Other), insurance (government-assisted; private; self-insured or other), highest educational level (less than high school; high school or graduate educational test; some college; college degree), trimester when prenatal care was commenced (first, second, third), parity (nulliparous *vs.* multiparous), and gestational age at delivery (20 to 31, 32 to 36, 37 to 40, 41 weeks or older), and mode of delivery, and the following ICD-9-CM diagnosis or procedure codes: chronic hypertension, preexisting or gestational diabetes, multiple gestation, prior cesarean, labor before delivery, prolonged labor, induction of labor, chorioamnionitis, placental abruption, polyhydramnios, placenta previa, fibroids, and stillbirth (see appendix, table A1, for list of ICD-9-CM codes). Individual hospitals in California were accounted for as random effects in the multilevel model. As five different comparisons were made (underweight, overweight, obesity class I, II, and III *vs.* normal BMI) in each regression model, a conservative cutoff of  $P \leq 0.01$  was chosen to minimize the chance of a type 1 error after multiple testing, with CIs of 99% to present odds ratios. In our primary analysis, we did not plan to adjust for hypertensive disorders of pregnancy (gestational hypertension, mild preeclampsia, severe preeclampsia or eclampsia) or diabetes (preexisting or gestational) because these conditions were assumed to be on the causal pathway between obesity and postpartum hemorrhage.

We examined models incorporating interaction terms to evaluate variation in the effect of BMI class on the risk of

postpartum hemorrhage, atonic hemorrhage, and severe hemorrhage according to mode of delivery. In the stratified models for vaginal and instrumental delivery, placenta previa and labor were not included as covariates because women with placenta previa invariably undergo cesarean delivery and labor precedes vaginal delivery. We also performed a sensitivity analysis to account for clustering according to the hospital where the delivery occurred using a generalized estimating equation. This approach averages the effect of BMI class across all hospitals.

We did not perform a sample size estimation *a priori*. However, we performed power analysis after identifying our analytic sample and before formal data analysis. The power calculation was based on the number of women with normal BMI ( $N = 1,068,211$ ) and obese class III women ( $N = 66,591$ ) in the analytic sample, a minimum detectable and clinically relevant odds ratio of 2.0 for postpartum hemorrhage in obesity class III women compared to normal BMI women, and an estimated postpartum hemorrhage prevalence of 2% among normal BMI women. To address the problem of multiple testing, we applied a Bonferroni corrected  $\alpha 0.05/5 = 0.01$  (based on five BMI classes being compared with a normal BMI group). Based on these parameters, we determined that our analytic sample had adequate power ( $\beta > 0.999$ ), and therefore, was sufficiently large to detect a clinically relevant difference between study groups.

## Results

A cohort flow diagram is presented in figure 1. Of 2,475,786 women who underwent delivery hospitalization

in California between 2008 and 2012, the final cohort consisted of 2,176,673 women. Deliveries occurred among 276 hospitals in California. We assumed that missing data were missing at random. The distribution of BMI groups was: underweight (4%), normal BMI (49.1%), overweight (25.9%), obese class I (12.7%), obese class II (5.2%), and obese class III (3.1%). There were significant differences in the distribution of patient characteristics across the BMI groups that are described in table 1. The absolute event rate for postpartum hemorrhage—our primary outcome—was 60,604/2,176,673 (2.8%). The overall frequency of atonic hemorrhage was 2.2% and severe hemorrhage was 0.4%. Figure 2 shows the rates of hemorrhage according to BMI class. Rates of postpartum hemorrhage and severe postpartum hemorrhage were similar across all BMI groups ( $P$  for trend  $> 0.05$ , respectively), whereas rates of atonic hemorrhage differed across BMI groups ( $P$  for trend = 0.01).

Table 2 presents the results of the main effects multivariable analyses assessing the independent effects of obesity on postpartum hemorrhage, atonic hemorrhage, and severe hemorrhage. Compared to women with a normal BMI, the odds of postpartum hemorrhage and atonic hemorrhage were increased for overweight women (postpartum hemorrhage: adjusted odds ratio [aOR], 1.06; 99% CI, 1.04 to 1.08; atonic hemorrhage: aOR, 1.07; 99% CI, 1.05 to 1.09) and for women with obesity class I (postpartum hemorrhage: aOR, 1.08; 99% CI, 1.05 to 1.11; atonic hemorrhage: aOR, 1.11; 99% CI, 1.08 to 1.15). However, women with obesity classes II and III were not at increased risk of postpartum hemorrhage or atonic hemorrhage, whereas

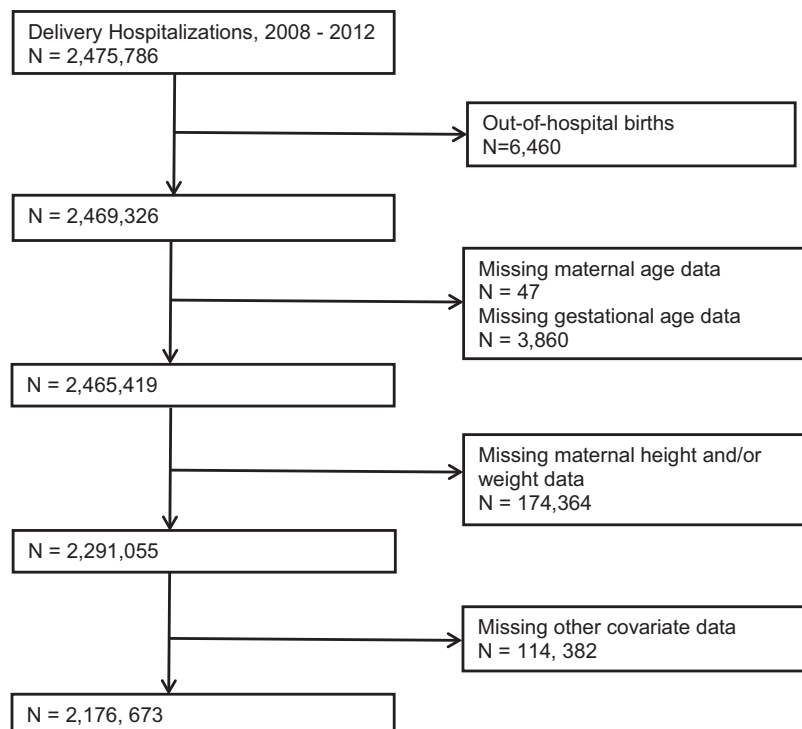

Fig. 1. Flow diagram.

**Table 1.** Patient Characteristics

| Characteristic                      | BMI < 18.5 kg/m <sup>2</sup><br>(n = 86,252) | BMI = 18.5–25 kg/m <sup>2</sup><br>(n = 1,068,211) | BMI = 25–29.9 kg/m <sup>2</sup><br>(n = 564,495) | BMI = 30–34.9 kg/m <sup>2</sup><br>(n = 277,306) | BMI = 35–39.9 kg/m <sup>2</sup><br>(n = 113,818) | BMI ≥ 40 kg/m <sup>2</sup><br>(n = 66,591) | P Value |
|-------------------------------------|----------------------------------------------|----------------------------------------------------|--------------------------------------------------|--------------------------------------------------|--------------------------------------------------|--------------------------------------------|---------|
| Age (yr)                            |                                              |                                                    |                                                  |                                                  |                                                  |                                            | < 0.001 |
| < 20                                | 12,760 (14.8%)                               | 105,585 (9.9%)                                     | 41,996 (7.5%)                                    | 16,877 (6.1%)                                    | 5,401 (4.8%)                                     | 2,229 (3.3%)                               |         |
| 20–24                               | 21,278 (24.6%)                               | 216,606 (20.3%)                                    | 119,755 (21.2%)                                  | 61,273 (22.1%)                                   | 25,286 (22.2%)                                   | 14,003 (21%)                               |         |
| 25–29                               | 21,529 (25%)                                 | 272,278 (25.5%)                                    | 156,544 (27.7%)                                  | 79,216 (28.6%)                                   | 34,018 (29.9%)                                   | 21,095 (31.7%)                             |         |
| 30–34                               | 18,965 (22%)                                 | 278,241 (26%)                                      | 143,258 (25.4%)                                  | 69,335 (25%)                                     | 29,313 (25.7%)                                   | 17,823 (26.8%)                             |         |
| 35–39                               | 9,654 (11.2%)                                | 155,924 (14.6%)                                    | 80,858 (14.3%)                                   | 39,716 (14.3%)                                   | 15,696 (13.8%)                                   | 9,235 (13.9%)                              |         |
| ≥ 40                                | 2,066 (2.4%)                                 | 39,577 (3.7%)                                      | 22,084 (3.9%)                                    | 10,889 (3.9%)                                    | 4,104 (3.6%)                                     | 2,206 (3.3%)                               |         |
| Race                                |                                              |                                                    |                                                  |                                                  |                                                  |                                            | < 0.001 |
| White Non-Hispanic                  | 25,457 (29.5%)                               | 347,983 (32.6%)                                    | 137,628 (24.4%)                                  | 60,848 (21.9%)                                   | 27,568 (24.2%)                                   | 16,799 (25.2%)                             |         |
| Black Non-Hispanic                  | 4,842 (5.6%)                                 | 50,530 (4.7%)                                      | 32,780 (5.8%)                                    | 18,507 (6.7%)                                    | 9,201 (8.1%)                                     | 7,809 (11.7%)                              |         |
| Asian Non-Hispanic                  | 22,033 (25.5%)                               | 150,880 (14.1%)                                    | 33,704 (6%)                                      | 8,727 (3.2%)                                     | 1,967 (1.7%)                                     | 536 (0.8%)                                 |         |
| Hawaiian/Pacific Islander           | 3,329 (3.9%)                                 | 42,961 (4%)                                        | 17,635 (3.1%)                                    | 7,302 (2.6%)                                     | 2,719 (2.4%)                                     | 1,384 (2.1%)                               |         |
| Hispanic                            | 30,222 (35%)                                 | 471,398 (44.1%)                                    | 339,796 (60.2%)                                  | 180,081 (64.9%)                                  | 71,414 (62.7%)                                   | 39,291 (59%)                               |         |
| American Indian/Alaska Native       | 305 (0.4%)                                   | 3,591 (0.4%)                                       | 2,509 (0.4%)                                     | 1,642 (0.6%)                                     | 878 (0.8%)                                       | 725 (1.1%)                                 |         |
| Other                               | 64 (0.1%)                                    | 868 (0.1%)                                         | 443 (0.1%)                                       | 199 (0.1%)                                       | 71 (0.1%)                                        | 47 (0.1%)                                  |         |
| Insurance                           |                                              |                                                    |                                                  |                                                  |                                                  |                                            | < 0.001 |
| Government                          | 40,778 (47.3%)                               | 463,565 (43.4%)                                    | 304,309 (53.9%)                                  | 161,586 (58.3%)                                  | 64,858 (57%)                                     | 38,814 (58.3%)                             |         |
| Private                             | 41,757 (48.4%)                               | 570,085 (53.4%)                                    | 245,013 (43.4%)                                  | 109,159 (39.3%)                                  | 46,605 (40.9%)                                   | 26,508 (39.8%)                             |         |
| Self-insured/Other                  | 3,717 (4.3%)                                 | 34,561 (3.2%)                                      | 15,173 (2.7%)                                    | 6,561 (2.4%)                                     | 2,355 (2.1%)                                     | 1,269 (1.9%)                               |         |
| Education                           |                                              |                                                    |                                                  |                                                  |                                                  |                                            | < 0.001 |
| Less than high school               | 17,323 (20.1%)                               | 214,850 (20.1%)                                    | 157,770 (28%)                                    | 81,048 (29.2%)                                   | 29,057 (25.6%)                                   | 15,118 (22.7%)                             |         |
| High school/GED                     | 22,098 (25.6%)                               | 248,563 (23.3%)                                    | 152,889 (27.1%)                                  | 83,226 (30%)                                     | 36,648 (32.2%)                                   | 22,722 (34.1%)                             |         |
| Some college                        | 14,911 (17.3%)                               | 182,488 (17.1%)                                    | 106,728 (18.9%)                                  | 58,095 (21%)                                     | 27,132 (23.8%)                                   | 17,708 (26.6%)                             |         |
| College degree(s)                   | 31,920 (37%)                                 | 422,310 (39.5%)                                    | 147,108 (26%)                                    | 54,937 (19.8%)                                   | 20,981 (18.4%)                                   | 11,043 (16.6%)                             |         |
| Onset of prenatal care              |                                              |                                                    |                                                  |                                                  |                                                  |                                            | < 0.001 |
| First trimester                     | 40,778 (47.3%)                               | 463,565 (43.4%)                                    | 304,309 (53.9%)                                  | 227,612 (82.1%)                                  | 93,302 (82%)                                     | 54,284 (81.5%)                             |         |
| Second trimester                    | 41,757 (48.4%)                               | 570,085 (53.4%)                                    | 245,013 (43.4%)                                  | 40,204 (14.5%)                                   | 16,762 (14.7%)                                   | 9,970 (15%)                                |         |
| Third trimester                     | 3,717 (4.3%)                                 | 34,561 (3.2%)                                      | 15,173 (2.7%)                                    | 9,490 (3.4%)                                     | 3,754 (3.3%)                                     | 2,337 (3.5%)                               |         |
| Gestational age at delivery (weeks) |                                              |                                                    |                                                  |                                                  |                                                  |                                            | < 0.001 |
| < 32                                | 891 (1%)                                     | 9,705 (0.9%)                                       | 6,062 (1.1%)                                     | 3,558 (1.3%)                                     | 1,699 (1.5%)                                     | 1,076 (1.6%)                               |         |
| 32–36 <sup>a6</sup>                 | 6,454 (7.5%)                                 | 66,940 (6.3%)                                      | 36,306 (6.4%)                                    | 19,286 (6.9%)                                    | 8,502 (7.5%)                                     | 5,523 (8.3%)                               |         |
| 37–40 <sup>a6</sup>                 | 73,499 (85.2%)                               | 908,960 (85.1%)                                    | 478,860 (84.8%)                                  | 234,303 (84.5%)                                  | 95,331 (83.7%)                                   | 55,314 (83.1%)                             |         |
| ≥ 41                                | 5,408 (6.3%)                                 | 82,606 (7.7%)                                      | 43,267 (7.7%)                                    | 20,159 (7.3%)                                    | 8,286 (7.3%)                                     | 4,678 (7%)                                 |         |
| Parity                              |                                              |                                                    |                                                  |                                                  |                                                  |                                            | < 0.001 |
| Nulliparous                         | 47,142 (54.7%)                               | 486,349 (45.5%)                                    | 193,897 (34.4%)                                  | 83,269 (30%)                                     | 33,335 (29.3%)                                   | 19,301 (29%)                               |         |
| Multiparous                         | 39,110 (45.3%)                               | 581,862 (54.5%)                                    | 370,598 (65.6%)                                  | 194,037 (70%)                                    | 80,483 (70.7%)                                   | 47,290 (71%)                               |         |

(Continued)

Table 1. (Continued)

| Characteristic                   | BMI < 18.5<br>kg/m <sup>2</sup><br>(n = 86,252) | BMI = 18.5–25<br>kg/m <sup>2</sup><br>(n = 1,068,211) | BMI = 25–29.9<br>kg/m <sup>2</sup><br>(n = 564,495) | BMI = 30–34.9<br>kg/m <sup>2</sup><br>(n = 277,306) | BMI = 35–39.9<br>kg/m <sup>2</sup><br>(n = 113,818) | BMI ≥ 40<br>kg/m <sup>2</sup><br>(n = 66,591) | P Value |
|----------------------------------|-------------------------------------------------|-------------------------------------------------------|-----------------------------------------------------|-----------------------------------------------------|-----------------------------------------------------|-----------------------------------------------|---------|
| Plurality                        |                                                 |                                                       |                                                     |                                                     |                                                     |                                               | < 0.001 |
| Singleton                        | 85,104 (98.7%)                                  | 1,051,255 (98.4%)                                     | 556,037 (98.5%)                                     | 273,045 (98.5%)                                     | 111,885 (98.3%)                                     | 65,368 (98.2%)                                |         |
| Multiparous                      | 1,148 (1.3%)                                    | 16,956 (1.6%)                                         | 8,458 (1.5%)                                        | 4,261 (1.5%)                                        | 1,933 (1.7%)                                        | 1,223 (1.8%)                                  |         |
| Chronic hypertension             | 398 (0.5%)                                      | 8,599 (0.8%)                                          | 10,221 (1.8%)                                       | 9,111 (3.3%)                                        | 6,337 (5.6%)                                        | 6,536 (9.8%)                                  | < 0.001 |
| Gestational hypertension         | 923 (1.1%)                                      | 16,743 (1.6%)                                         | 13,790 (2.4%)                                       | 9,257 (3.3%)                                        | 4,894 (4.3%)                                        | 3,572 (5.3%)                                  | < 0.001 |
| Mild preeclampsia                | 953 (1.1%)                                      | 14,863 (1.4%)                                         | 11,444 (2.0%)                                       | 7,423 (2.7%)                                        | 3,720 (3.3%)                                        | 2,629 (3.9%)                                  | < 0.001 |
| Severe preeclampsia or eclampsia | 755 (0.9%)                                      | 10,255 (1.0%)                                         | 6,962 (1.2%)                                        | 4,085 (1.5%)                                        | 2,029 (1.8%)                                        | 1,379 (2.1%)                                  | < 0.001 |
| Fibroids                         | 682 (0.8%)                                      | 13,149 (1.2%)                                         | 7,937 (1.4%)                                        | 4,188 (1.5%)                                        | 1,838 (1.6%)                                        | 1,171 (1.8%)                                  | < 0.001 |
| Diabetes mellitus                | 133 (0.1%)                                      | 3,801 (0.4%)                                          | 4,885 (0.9%)                                        | 4,678 (1.7%)                                        | 3,054 (2.7%)                                        | 2,819 (4.2%)                                  | < 0.001 |
| Previous cesarean                | 7,913 (9.2%)                                    | 140,855 (13.2%)                                       | 104,677 (18.5%)                                     | 62,263 (22.4%)                                      | 29,164 (25.6%)                                      | 20,134 (30.2%)                                | < 0.001 |
| Stillbirth                       | 58 (0.1%)                                       | 808 (0.1%)                                            | 444 (0.1%)                                          | 227 (0.08%)                                         | 107 (0.09%)                                         | 69 (0.1%)                                     | 0.04    |
| Placenta previa                  | 604 (0.7%)                                      | 7,526 (0.7%)                                          | 3,651 (0.7%)                                        | 1,606 (0.6%)                                        | 585 (0.5%)                                          | 302 (0.5%)                                    | < 0.001 |
| Prolonged labor                  | 1,171 (1.3%)                                    | 13,852 (1.3%)                                         | 5,107 (0.9%)                                        | 1,912 (0.7%)                                        | 730 (0.6%)                                          | 397 (0.6%)                                    | < 0.001 |
| Labor                            | 31,935 (37%)                                    | 396,640 (37.1%)                                       | 206,787 (36.6%)                                     | 102,272 (36.9%)                                     | 42,168 (37.1%)                                      | 25,104 (37.7%)                                | < 0.001 |
| Chorioamnionitis                 | 1,801 (2.1%)                                    | 24,976 (2.3%)                                         | 12,615 (2.2%)                                       | 5,532 (2%)                                          | 2,140 (1.9%)                                        | 1,198 (1.8%)                                  | < 0.001 |
| Abruption                        | 903 (1.1%)                                      | 9,355 (0.9%)                                          | 4,699 (0.8%)                                        | 2,356 (0.9%)                                        | 978 (0.9%)                                          | 544 (0.8%)                                    | < 0.001 |
| Polyhydramnios                   | 236 (0.3%)                                      | 4,087 (0.4%)                                          | 2,758 (0.5%)                                        | 1,744 (0.6%)                                        | 876 (0.8%)                                          | 633 (0.9%)                                    | < 0.001 |
| Induction                        | 10,888 (12.6%)                                  | 152,078 (14.2%)                                       | 86,149 (15.3%)                                      | 45,403 (16.4%)                                      | 20,322 (17.9%)                                      | 12,473 (18.7%)                                | < 0.001 |
| Mode of delivery                 |                                                 |                                                       |                                                     |                                                     |                                                     |                                               | < 0.001 |
| Vaginal                          | 61,438 (71.2%)                                  | 721,708 (67.6%)                                       | 355,529 (63%)                                       | 161,243 (58.1%)                                     | 59,932 (52.6%)                                      | 29,791 (44.7%)                                |         |
| Assisted vaginal                 | 4,887 (5.7%)                                    | 46,242 (4.3%)                                         | 16,840 (3%)                                         | 6,264 (2.3%)                                        | 2,119 (1.9%)                                        | 1,043 (1.6%)                                  |         |
| Cesarean                         | 19,927 (23.1%)                                  | 300,261 (28.1%)                                       | 192,126 (34%)                                       | 109,799 (39.6%)                                     | 51,767 (45.5%)                                      | 35,757 (53.7%)                                |         |

Data presented as n (%). +6 indicates six additional days.

BMI = body mass index; GED = graduate educational test.



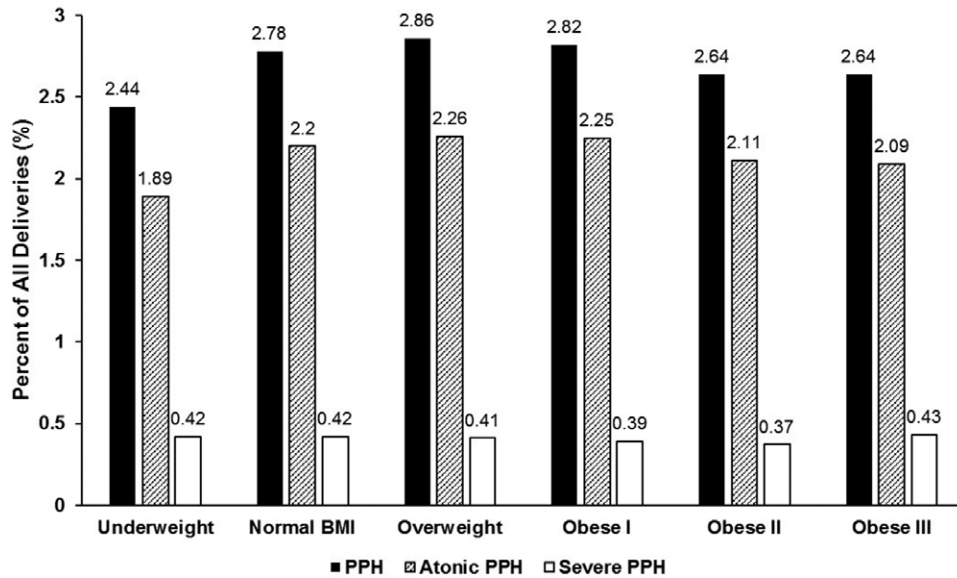

**Fig. 2.** Obesity class I, II, and III refer to World Health Organization obesity classes I, II, and III. PPH = postpartum hemorrhage.

**Table 2.** Results of the Multilevel Logistic Regression Analyses Showing the Relationship between Maternal Body Mass Index and Postpartum Hemorrhage Outcomes

| BMI (kg/m <sup>2</sup> ) | PPH*, aOR (99% CI) | Atonic PPH*, aOR (99% CI) | Severe PPH*, aOR (99% CI) |
|--------------------------|--------------------|---------------------------|---------------------------|
| < 18.5                   | 0.92 (0.87–0.96)   | 0.89 (0.84–0.94)          | 1.05 (0.94–1.17)          |
| 18.5–24.9                | Reference          | Reference                 | Reference                 |
| 25–29.9                  | 1.06 (1.04–1.08)   | 1.07 (1.05–1.09)          | 0.94 (0.89–0.99)          |
| 30–34.9                  | 1.08 (1.05–1.11)   | 1.11 (1.08–1.15)          | 0.85 (0.8–0.91)           |
| 35–39.9                  | 1.01 (0.97–1.05)   | 1.04 (1.0–1.09)           | 0.78 (0.71–0.87)          |
| ≥ 40                     | 1.01 (0.96–1.07)   | 1.03 (0.98–1.09)          | 0.85 (0.76–0.97)          |

\*Hierarchical models adjusted for maternal age, race/ethnicity, insurance, education, chronic hypertension, trimester when prenatal care was initiated, gestational age at delivery, parity, plurality, previous cesarean section, labor, prolonged labor, induction of labor, chorioamnionitis, placental abruption, polyhydramnios, previa, fibroids, stillbirth, and mode of delivery. Hospital site was considered as a random effect, to account for patient clustering. aOR = adjusted odds ratio; BMI = body mass index; PPH = postpartum hemorrhage.

being underweight was associated with reduced odds of postpartum hemorrhage (aOR, 0.92; 99% CI, 0.87 to 0.96) and atonic hemorrhage (aOR, 0.89; 99% CI, 0.84 to 0.94). Being overweight or obese class I, II, or III was associated with reduced odds of severe postpartum hemorrhage (e.g., for obesity class III, severe postpartum hemorrhage aOR, 0.85; 99% CI, 0.76 to 0.97). We explored whether adjustment for diabetes and hypertensive disorders of pregnancy further influenced the relations between BMI class and postpartum hemorrhage (data presented in the appendix, table A2). Addition of these covariates further modestly attenuated the associations between overweight (aOR, 1.04; 99% CI, 1.01 to 1.07) and obesity class I (aOR, 1.05; 99% CI, 1.01 to 1.09) with postpartum hemorrhage suggesting potential association of these comorbidities with enhancement in hemorrhage risk. We also ran a generalized estimating equation model for our primary outcome to assess whether the point estimates differed compared to those obtained in our mixed effects logistic regression model. The results of this model clustering on hospital were very similar to those of

our main findings (data not presented), with no substantial changes in the strength or direction of association between BMI classes with postpartum hemorrhage.

Because we observed evidence of interaction between obesity and mode of delivery ( $P < 0.2$ ) in models with postpartum hemorrhage, atonic hemorrhage, and severe hemorrhage as dependent variables, we performed stratified analyses according to delivery mode (table 3). The study cohort comprised 1,389,641 (63.8%) vaginal deliveries, 77,395 (3.6%) instrumental deliveries, and 709,637 (32.6%) cesarean deliveries. The presence, strength, and magnitude of the relations between BMI class and each hemorrhage outcome differed according to delivery mode. Among those undergoing vaginal delivery, overweight and women of any class of obesity class had up to 19% increased odds of postpartum hemorrhage or atonic hemorrhage, as compared to normal BMI women. In contrast, no associations were found between being overweight or any obesity class status with postpartum hemorrhage, atonic hemorrhage, or severe hemorrhage in the instrumental delivery cohorts. In the cesarean delivery cohort,

**Table 3.** Adjusted Odds Ratios for the Relationship between Maternal Body Mass Index and Postpartum Hemorrhage Outcomes, Stratified by Mode of Delivery

| BMI (kg/m <sup>2</sup> )      | PPH           |                  | Atonic PPH    |                  | Severe PPH   |                  |
|-------------------------------|---------------|------------------|---------------|------------------|--------------|------------------|
|                               | n (%)         | aOR (99% CI)     | n (%)         | aOR (99% CI)     | n (%)        | aOR (99% CI)     |
| <b>Vaginal delivery*</b>      |               |                  |               |                  |              |                  |
| < 18.5                        | 1,504 (2.4%)  | 0.92 (0.86–0.99) | 1,164 (1.9%)  | 0.90 (0.83–0.97) | 203 (0.3%)   | 1.1 (0.91–1.33)  |
| 18.5–24.9                     | 20,432 (2.8%) | Reference        | 16,036 (2.2%) | Reference        | 2,173 (0.3%) | Reference        |
| 25–29.9                       | 11,090 (3.1%) | 1.09 (1.06–1.13) | 8,720 (2.4%)  | 1.1 (1.06–1.14)  | 1,050 (0.3%) | 0.97 (0.88–1.08) |
| 30–34.9                       | 5,325 (3.3%)  | 1.16 (1.12–1.21) | 4,233 (2.6%)  | 1.19 (1.14–1.25) | 479 (0.3%)   | 0.97 (0.85–1.11) |
| 35–39.9                       | 1,953 (3.3%)  | 1.12 (1.05–1.19) | 1,524 (2.5%)  | 1.13 (1.05–1.21) | 151 (0.2%)   | 0.81 (0.65–1.01) |
| ≥ 40                          | 1,042 (3.5%)  | 1.15 (1.06–1.25) | 805 (2.7%)    | 1.15 (1.05–1.27) | 99 (0.3%)    | 1.02 (0.78–1.34) |
| <b>Instrumental delivery*</b> |               |                  |               |                  |              |                  |
| < 18.5                        | 177 (3.6%)    | 0.96 (0.81–1.12) | 134 (2.7%)    | 0.85 (0.67–1.08) | 36 (0.8%)    | 1.23 (0.78–1.97) |
| 18.5–24.9                     | 1,913 (4.1%)  | Reference        | 1,585 (3.4%)  | Reference        | 291 (0.6%)   | Reference        |
| 25–29.9                       | 743 (4.4%)    | 1.09 (0.99–1.19) | 617 (3.7%)    | 1.1 (0.97–1.25)  | 100 (0.6%)   | 0.91 (0.67–1.23) |
| 30–34.9                       | 274 (4.4%)    | 1.13 (0.99–1.3)  | 223 (3.6%)    | 1.12 (0.92–1.37) | 38 (0.6%)    | 0.91 (0.58–1.44) |
| 35–39.9                       | 80 (3.8%)     | 0.97 (0.77–1.23) | 70 (3.3%)     | 1.05 (0.75–1.45) | 12 (0.6%)    | 0.84 (0.39–1.82) |
| ≥ 40                          | 54 (5.2%)     | 1.29 (0.96–1.72) | 42 (4.0%)     | 1.22 (0.79–1.86) | 9 (0.9%)     | 1.32 (0.54–3.24) |
| <b>Cesarean delivery*</b>     |               |                  |               |                  |              |                  |
| < 18.5                        | 333 (1.7%)    | 0.96 (0.78–1.18) | 127 (0.6%)    | 0.88 (0.76–1.02) | 98 (0.5%)    | 0.94 (0.74–1.19) |
| 18.5–24.9                     | 5,910 (2.0%)  | Reference        | 2,048 (0.7%)  | Reference        | 1,605 (0.5%) | Reference        |
| 25–29.9                       | 3,427 (1.8%)  | 1.09 (0.97–1.23) | 1,186 (0.6%)  | 0.99 (0.93–1.05) | 902 (0.5%)   | 0.91 (0.83–1.00) |
| 30–34.9                       | 1,782 (1.6%)  | 1.13 (0.95–1.36) | 553 (0.5%)    | 0.95 (0.88–1.02) | 415 (0.4%)   | 0.77 (0.67–0.87) |
| 35–39.9                       | 809 (1.6%)    | 0.97 (0.71–1.32) | 257 (0.5%)    | 0.91 (0.82–1.00) | 200 (0.4%)   | 0.76 (0.64–0.91) |
| ≥ 40                          | 543 (1.5%)    | 1.28 (0.88–1.88) | 180 (0.5%)    | 0.87 (0.79–0.98) | 134 (0.4%)   | 0.76 (0.62–0.94) |

\*Rates of PPH were row percentages with the denominator based on the number of women in each BMI class. Models adjusted for maternal age, race/ethnicity, insurance, education, chronic hypertension, trimester when prenatal care was initiated, gestational age at delivery, parity, plurality, previous cesarean delivery, prolonged labor, induction of labor, chorioamnionitis, placental abruption, polyhydramnios, fibroids, and stillbirth. Hospital site was considered as a random effect, to account for patient clustering within site. Labor and placenta previa were also adjusted for in the models for cesarean delivery.

aOR = adjusted odds ratio; BMI = body mass index; PPH = postpartum hemorrhage.

belonging to obesity class III had a 13% decreased odds of atonic hemorrhage compared to normal BMI women. The odds of severe hemorrhage were even lower for obesity class I (aOR, 0.77; 99% CI, 0.67 to 0.87), class II (aOR, 0.76; 99% CI, 0.64 to 0.91), and class III (aOR, 0.76; 99% CI, 0.62 to 0.94) compared to normal BMI women.

## Discussion

In this large population-based cohort study, we observed only a very small effect of maternal BMI on the risk of postpartum hemorrhage. We did not find strong evidence of positive dose–response relationships between BMI class with postpartum hemorrhage, atonic hemorrhage, or severe hemorrhage. These findings suggest that maternal obesity is not an important risk factor for postpartum hemorrhage.

There is a notable lack of clarity in the association between BMI class and postpartum hemorrhage reported in observational studies.<sup>11</sup> In a number of population-based studies from Denmark, Canada, Finland, and the United States comparing perinatal outcomes between obese and nonobese women with singleton pregnancies, obesity was not associated with postpartum hemorrhage.<sup>15–17,23</sup> Data from other studies suggest that obese women are at reduced risk of hemorrhage and morbidity. Among 743,630 pregnant women

who delivered in Washington State between 2004 and 2013, obese class III had a 30% decreased odds of severe postpartum hemorrhage compared with normal BMI.<sup>24</sup> In a single-center study, Paglia *et al.* reported that nonobese women had a 1.8-fold increased odds of severe hemorrhage compared to obese women.<sup>14</sup> Butwick *et al.* reported that among women experiencing uterine atony during cesarean delivery, obese women were at reduced risk of hemorrhage-related morbidity compared to nonobese women.<sup>25</sup> These findings are consistent with the inverse association we observed between maternal obesity and severe hemorrhage, especially among women undergoing cesarean delivery.

In contrast to our main findings, two population-wide studies have reported a positive association between obesity and postpartum hemorrhage. In a study examining 1,114,071 Swedish women with singleton pregnancies, the risk of atonic hemorrhage was increased by 14, 47, and 114% in women from obesity classes I, II, and III, respectively compared to nonobese women.<sup>12</sup> In a Japanese study of 97,157 women with singleton pregnancies, obese women had 1.1-fold and 1.9-fold increased risk of postpartum hemorrhage compared to nonobese women after vaginal and cesarean delivery, respectively.<sup>13</sup> Residual confounding, instead of a true effect of obesity, may explain at least part of the increased risk of hemorrhage observed in these studies.

In our study, maternal obesity was more prevalent and we accounted for a larger set of relevant confounders to provide more clarity about the associations between maternal obesity and postpartum hemorrhage. Although we had adequate power to detect a minimum odds ratio of 2, the point estimates in our primary analysis were substantially lower despite being statistically significant for overweight and obesity class I women. These findings suggest that the relations between maternal BMI and postpartum hemorrhage are of questionable clinical significance. We acknowledge that differences between medical care systems and practices, racial compositions, and national obesity rates may also explain why the reported associations between BMI class and postpartum hemorrhage vary across different populations.

The small effect of BMI on postpartum hemorrhage risk has important clinical ramifications. Risk assessment is a critical aspect of postpartum hemorrhage prevention. By identifying at-risk patients, providers can ensure that adequate resources and staff are available to manage hemorrhage prior to delivery. This key aspect of care is described in the consensus bundle for obstetric hemorrhage published by The National Partnership for Maternal Safety.<sup>8</sup> Similarly, in their latest postpartum hemorrhage guidelines, the American College of Obstetricians and Gynecologists suggest that a risk assessment tool be considered.<sup>26</sup> Well-established risk factors, such as chorioamnionitis, multiple gestation, and hypertensive disorders of pregnancy,<sup>18,19,27</sup> are likely to be considered for inclusion in these tools. However, based on our findings, consideration of obesity in these risk assessment tools may not be warranted.

Several potential explanations can be offered for the small effect of BMI on postpartum hemorrhage risk and the reduced risk of severe hemorrhage. First, the findings of our sensitivity analysis suggest that effect of obesity may be partly influenced by the presence of diabetes and/or hypertensive disorders. The addition of these factors to our regression models modestly attenuated the weak positive association between obesity and postpartum hemorrhage. Second, uterine atony is recognized as the leading etiology for postpartum hemorrhage.<sup>18,19</sup> In our study, we observed no monotonic increase in the rate of atonic hemorrhage with increasing BMI. This may be because uterine contractility or oxytocin signaling does not differ markedly across BMI classes. Data from *in vitro* studies suggest that no differences in contraction strength or frequency in myometrial strips exist between obese *versus* nonobese women,<sup>28</sup> and oxytocin receptor gene and protein expression in myometrial strips are not related to maternal BMI.<sup>29</sup> However, other work suggests that myometrial samples taken from obese women contract with less force and less frequency compared to those from nonobese women.<sup>30</sup> Third, compared to nonobese patients, obese patients have a hypercoagulable state (manifest by higher plasma fibrinogen, factor VII, factor VIII, von Willebrand factor, and plasminogen activator inhibitor levels),<sup>31</sup> which may mitigate the severity of blood loss and the need

for transfusion during a major bleed. Fourth, because obese women have larger blood volumes than nonobese women,<sup>32</sup> patients may tolerate more blood loss (assuming isovolemic hemodilution) before reaching a transfusion trigger or experiencing the consequences of hemorrhagic shock.

Our study has several strengths. In this large population-based study, which included more than 2 million women, we were able to characterize a diverse obstetric cohort to study an outcome with a low prevalence. The overall prevalence of postpartum hemorrhage, atonic hemorrhage, and severe hemorrhage are in line with those reported in other population-wide studies.<sup>4,5,19</sup> Through the use of linked administrative discharge data and vital statistics data, we had access to detailed patient information, including prepregnancy BMI, to examine the association between maternal obesity and postpartum hemorrhage. Previous epidemiologic studies of postpartum hemorrhage in the United States lack maternal BMI data.<sup>4,5,19</sup> Our study has a number of limitations. A potential limitation is the accuracy and validity of maternal discharge data and birth certificate data for classifying key variables. Although postpartum hemorrhage was classified using administrative data, validation studies report high positive predictive values (greater than 80%) for ICD-9-CM codes.<sup>33,34</sup> Several studies have assessed the reliability of BMI data on birth certificates. In a study comparing birth certificate to medical record data in 1,204 births, Bodnar *et al.* demonstrated good agreement in the prepregnancy BMI categorization for normal BMI, overweight, and obese class II and III women.<sup>35</sup> Using data from the Women, Infants, and Children Program in Florida, Park *et al.* also found that prepregnancy weight, height, and BMI from birth certificates are reliable and are valid for use in population-based studies.<sup>36</sup> Chen *et al.*, using data from the 1988 National Maternal and Infant Health Survey, observed a high correlation (0.9) between self-reported and recorded prepregnancy BMI data.<sup>37</sup> We did not account for weight gain during pregnancy. Because gestational weight gain decreases with increasing BMI,<sup>38</sup> this may partially explain why the differences in postpartum hemorrhage risk were modest between obese and normal BMI women. Further studies are needed to examine the influence of gestational weight gain on hemorrhage risk. Prolonged labor and induction of labor may be on the causal pathway between maternal obesity and postpartum hemorrhage; therefore, adjustment for these variables may have influenced the strength of our observed associations. We could not account for residual confounders in our analysis, such as exposure to antenatal anemia, antenatal anticoagulation, mode of analgesia or anesthesia. Therefore, residual confounding may partially explain the weak positive association between being overweight or obesity class I and postpartum hemorrhage. In our stratified analyses, variation in the size of each delivery cohort and resultant type 2 error may explain the differential findings according to delivery mode. Because blood loss data are not captured in our data source, we used transfusion codes



as a proxy for severe hemorrhage, an approach also used in previous population-wide studies.<sup>1,2,39</sup> We could not determine whether transfusion was given during the acute period of active blood loss or for treating postpartum anemia after arrest of bleeding. Therefore, it is unclear whether transfusion is a marker of bleeding severity *versus* anemia severity after postpartum hemorrhage.

In summary, our findings demonstrate that obesity is not a strong risk factor for postpartum hemorrhage. A detrimental effect on postpartum hemorrhage from obesity is likely to be much lower than previously reported in selected analyses and may only have modest clinical relevance.

## Research Support

This work was supported by funding from the Child Health Research Institute, Lucile Packard Foundation for Children's Health, and the Stanford Clinical and Translational Science Award (UL1 TR001085), Stanford, California. Dr. Butwick is also supported by an award from the Eunice Kennedy Shriver National Institute of Child Health and Human Development (K23HD070972). Dr. Stephansson is supported by the Swedish Research Council (2013–2429) and the Strategic Research Program in Epidemiology at Karolinska Institutet, Stockholm, Sweden.

## Competing Interests

The authors declare no competing interests.

## Correspondence

Address correspondence to Dr. Butwick: Department of Anesthesiology, Perioperative, and Pain Medicine, Stanford University School of Medicine, 300 Pasteur Drive, Stanford, California 94305. [ajbut@stanford.edu](mailto:ajbut@stanford.edu). Information on purchasing reprints may be found at [www.anesthesiology.org](http://www.anesthesiology.org) or on the masthead page at the beginning of this issue. ANESTHESIOLOGY's articles are made freely accessible to all readers, for personal use only, 6 months from the cover date of the issue.

## References

- Callaghan WM, Creanga AA, Kuklina EV: Severe maternal morbidity among delivery and postpartum hospitalizations in the United States. *Obstet Gynecol* 2012; 120:1029–36
- Kuklina EV, Meikle SF, Jamieson DJ, Whiteman MK, Barfield WD, Hillis SD, Posner SF: Severe obstetric morbidity in the United States: 1998–2005. *Obstet Gynecol* 2009; 113:293–9
- Berg CJ, Callaghan WM, Syverson C, Henderson Z: Pregnancy-related mortality in the United States, 1998 to 2005. *Obstet Gynecol* 2010; 116:1302–9
- Callaghan WM, Kuklina EV, Berg CJ: Trends in postpartum hemorrhage: United States, 1994–2006. *Am J Obstet Gynecol* 2010; 202: 353.e1–6
- Kramer MS, Berg C, Abenheim H, Dahhou M, Rouleau J, Mehrabadi A, Joseph KS: Incidence, risk factors, and temporal trends in severe postpartum hemorrhage. *Am J Obstet Gynecol* 2013; 209:449.e1–7
- Callaghan WM, Grobman WA, Kilpatrick SJ, Main EK, D'Alton M: Facility-based identification of women with severe maternal morbidity: It is time to start. *Obstet Gynecol* 2014; 123:978–81
- D'Alton ME, Main EK, Menard MK, Levy BS: The National Partnership for Maternal Safety. *Obstet Gynecol* 2014; 123:973–7
- Main EK, Goffman D, Scavone BM, Low LK, Bingham D, Fontaine PL, Gorlin JB, Lagrew DC, Levy BS; National Partnership for Maternal Safety; Council for Patient Safety in Women's Health Care: National Partnership for Maternal Safety: consensus bundle on obstetric hemorrhage. *Anesth Analg* 2015; 121:142–8
- Branum AM, Kirmeyer SE, Gregory EC: Prepregnancy body mass index by maternal characteristics and state: Data from the birth certificate, 2014. *Natl Vital Stat Rep* 2016; 65:1–11
- Flegal KM, Kruszon-Moran D, Carroll MD, Fryar CD, Ogden CL: Trends in obesity among adults in the United States, 2005 to 2014. *JAMA* 2016; 315:2284–91
- Knight M, Callaghan WM, Berg C, Alexander S, Bouvier-Colle MH, Ford JB, Joseph KS, Lewis G, Liston RM, Roberts CL, Oats J, Walker J: Trends in postpartum hemorrhage in high resource countries: A review and recommendations from the International Postpartum Hemorrhage Collaborative Group. *BMC Pregnancy Childbirth* 2009; 9:55
- Blomberg M: Maternal obesity and risk of postpartum hemorrhage. *Obstet Gynecol* 2011; 118:561–8
- Enomoto K, Aoki S, Toma R, Fujiwara K, Sakamaki K, Hirahara F: Pregnancy outcomes based on pre-pregnancy body mass index in Japanese women. *PLoS One* 2016; 11:e0157081
- Paglia MJ, Grotegut CA, Johnson LN, Thames B, James AH: Body mass index and severe postpartum hemorrhage. *Gynecol Obstet Invest* 2012; 73:70–4
- Kim SS, Zhu Y, Grantz KL, Hinkle SN, Chen Z, Wallace ME, Smarr MM, Epps NM, Mendola P: Obstetric and neonatal risks among obese women without chronic disease. *Obstet Gynecol* 2016; 128:104–12
- Ovesen P, Rasmussen S, Kesmodel U: Effect of prepregnancy maternal overweight and obesity on pregnancy outcome. *Obstet Gynecol* 2011; 118:305–12
- Schummers L, Hutcheon JA, Bodnar LM, Lieberman E, Himes KP: Risk of adverse pregnancy outcomes by prepregnancy body mass index: A population-based study to inform prepregnancy weight loss counseling. *Obstet Gynecol* 2015; 125:133–43
- Al-Zirqi I, Vangen S, Forsen L, Stray-Pedersen B: Prevalence and risk factors of severe obstetric haemorrhage. *BJOG* 2008; 115:1265–72
- Bateman BT, Berman MF, Riley LE, Leffert LR: The epidemiology of postpartum hemorrhage in a large, nationwide sample of deliveries. *Anesth Analg* 2010; 110:1368–73
- Alanis MC, Villers MS, Law TL, Steadman EM, Robinson CJ: Complications of cesarean delivery in the massively obese parturient. *Am J Obstet Gynecol* 2010; 203:271.e1–7
- Girsens AI, Osmundson SS, Naqvi M, Garabedian MJ, Lyell DJ: Body mass index and operative times at cesarean delivery. *Obstet Gynecol* 2014; 124:684–9
- World Health Organization: Obesity: preventing and managing the global epidemic. Report of a WHO consultation, World Health Organization Technical Report Series. Edited by World Health Organization. Geneva, 2000, pp i-xii, 1–253
- Pallasmaa N, Ekblad U, Aitokallio-Tallberg A, Uotila J, Raudaskoski T, Ulander VM, Hurme S: Cesarean delivery in Finland: Maternal complications and obstetric risk factors. *Acta Obstet Gynecol Scand* 2010; 89:896–902
- Lisonkova S, Muraca GM, Potts J, Liauw J, Chan WS, Skoll A, Lim KI: Association between prepregnancy body mass index and severe maternal morbidity. *JAMA* 2017; 318:1777–86
- Butwick AJ, Carvalho B, El-Sayed YY: Risk factors for obstetric morbidity in patients with uterine atony undergoing cesarean delivery. *Br J Anaesth* 2014; 113:661–8
- The American College of Obstetricians and Gynecologists: ACOG Practice Bulletin No. 183: Postpartum hemorrhage. *Obstet Gynecol* 2017; 130: e168–86
- Mehrabadi A, Hutcheon JA, Lee L, Kramer MS, Liston RM, Joseph KS: Epidemiological investigation of a temporal increase in atonic postpartum haemorrhage: A

population-based retrospective cohort study. *BJOG* 2013; 120:853–62

28. Higgins CA, Martin W, Anderson L, Blanks AM, Norman JE, McConnachie A, Nelson SM: Maternal obesity and its relationship with spontaneous and oxytocin-induced contractility of human myometrium *in vitro*. *Reprod Sci* 2010; 17:177–85

29. Grotegut CA, Gunatilake RP, Feng L, Heine RP, Murtha AP: The influence of maternal body mass index on myometrial oxytocin receptor expression in pregnancy. *Reprod Sci* 2013; 20:1471–7

30. Zhang J, Bricker L, Wray S, Quenby S: Poor uterine contractility in obese women. *BJOG* 2007; 114:343–8

31. Mertens I, Van Gaal LF: Obesity, haemostasis and the fibrinolytic system. *Obes Rev* 2002; 3:85–101

32. Hernandez JS, Alexander JM, Sarode R, McIntire DD, Leveno KJ: Calculated blood loss in severe obstetric hemorrhage and its relation to body mass index. *Am J Perinatol* 2012; 29:557–60

33. Lain SJ, Roberts CL, Hadfield RM, Bell JC, Morris JM: How accurate is the reporting of obstetric haemorrhage in hospital discharge data? A validation study. *Aust N Z J Obstet Gynaecol* 2008; 48:481–4

34. Romano PS, Yasmeen S, Schembri ME, Keyzer JM, Gilbert WM: Coding of perineal lacerations and other complications of obstetric care in hospital discharge data. *Obstet Gynecol* 2005; 106:717–25

35. Bodnar LM, Abrams B, Bertolet M, Gernand AD, Parisi SM, Himes KP, Lash TL: Validity of birth certificate-derived maternal weight data. *Paediatr Perinat Epidemiol* 2014; 28:203–12

36. Park S, Sappenfield WM, Bish C, Bensyl DM, Goodman D, Menges J: Reliability and validity of birth certificate prepregnancy weight and height among women enrolled in prenatal WIC program: Florida, 2005. *Matern Child Health J* 2011; 15:851–9

37. Chen A, Feresu SA, Fernandez C, Rogan WJ: Maternal obesity and the risk of infant death in the United States. *Epidemiology* 2009; 20:74–81

38. Chu SY, Callaghan WM, Bish CL, D'Angelo D: Gestational weight gain by body mass index among US women delivering live births, 2004–2005: Fueling future obesity. *Am J Obstet Gynecol* 2009; 200:271e1-7

39. Callaghan WM, Mackay AP, Berg CJ: Identification of severe maternal morbidity during delivery hospitalizations, United States, 1991–2003. *Am J Obstet Gynecol* 2008; 199: 133 e1-8

Appendix

**Table A1.** International Classification of Diseases, Ninth Revision, Clinical Modification (ICD-9-CM) Codes Used to Identify Diagnoses and Procedures

---

Chronic hypertension = 401.x-405.x; 642.0x-642.2x; 642.7x; 642.9x

Diabetes = 249.xx-250.xx, 648.0x

Multiple gestation = V27.2–V27.8, 651.x

Prior cesarean = 654.2x

Labor prior to delivery = 644.x, 656.3x, 660–663.x, 665.1x,

Prolonged labor = 662.x

Induction of labor = 73.01; 73.1; 73.4, 659.0x-659.1x

Chorioamnionitis = 658.4x

Placental abruption = 641.2x

Polyhydramnios = 657.x

Placenta previa = 641.0x-641.1x

Fibroids = 218.x, 654.1x

Stillbirth = V27.1, V27.3, V27.4, V27.6, V27.7

---

**Table A2.** Multilevel Logistic Regression Analysis Showing the Relationship between Maternal Body Mass Index and Postpartum Hemorrhage Including Diabetes and Hypertensive Disorders of Pregnancy as Covariates

---

| BMI (kg/m <sup>2</sup> ) | PPH*, aOR (99% CI) |
|--------------------------|--------------------|
| < 18.5                   | 0.92 (0.87–0.98)   |
| 18.5–24.9                | Reference          |
| 25–29.9                  | 1.04 (1.01–1.07)   |
| 30–34.9                  | 1.05 (1.01–1.09)   |
| 35–39.9                  | 0.97 (0.92–1.02)   |
| ≥ 40                     | 0.96 (0.9–1.03)    |

---

\*Hierarchical model adjusted for maternal age, race/ethnicity, insurance, education, chronic hypertension, trimester when prenatal care was initiated, gestational age at delivery, parity, multiple gestation, previous cesarean section, labor, prolonged labor, induction of labor, chorioamnionitis, placental abruption, polyhydramnios, previa, fibroids, diabetes (preexisting or gestational), gestational hypertension, preeclampsia, stillbirth, and mode of delivery. Hospital site was considered as a random effect, to account for patient clustering.

aOR = odds ratio; BMI = body mass index; PPH = postpartum hemorrhage.
